the cortex. Bone marrow showed pan-hyperplasia with no evidence of dyscrasia.

#### DIAGNOSIS AT NECROPSY

I. Shock, postoperative and hemorrhagic diathesis with

- (a) Hemothorax, right
  - (1) Atelectasis, upper and middle lobes, right lung
- (b) Intrabronchial and intrapulmonary hemorrhage, lower lobe, right lung

(c) Lower nephron nephrosis, bilateral

(d) Focal areas of necrosis, spleen

(e) Nonspecific ulceration, colon

II. Pneumonia, lobar, lower lobe, left lung.

O. G. GLESNE, M.D.,  
*Section of Anesthesiology,  
 Veterans Administration Hospital,  
 Des Moines, Iowa, and  
 Division of Anesthesiology,  
 State University of Iowa,  
 Iowa City, Iowa*

### VAPOR-PROOF LAMP FOR USE WITH THE HEAD MIRROR IN THE OPERATING ROOM

When the hazard of fire or explosion is likely to exist, portable lamps should be enclosed in a manner approved for explosive atmospheres, in accordance with the National Electrical Code, section 5021.

Commercial portable enclosed lamps emit parallel rays in a beam, and are unsatisfactory for use with the head mirror. A head lamp is a safe alternative to the head mirror if the lamp is operated at a voltage

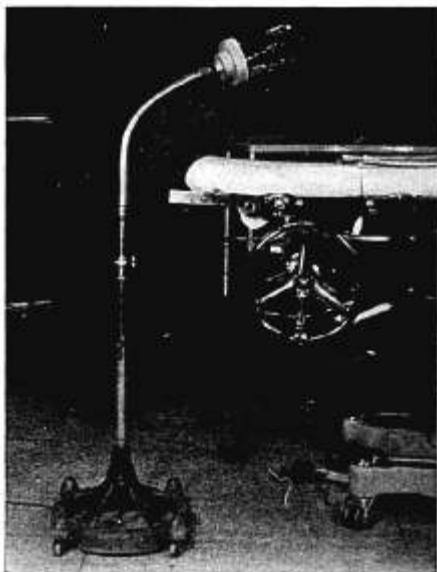

of 6 volts or less, but many operators believe that illumination by the head lamp is unsatisfactory. The ideal source of light to employ with the head mirror should radiate with constant intensity through a wide angle; this enables the operator to move freely about an arc of a circle, the center of which is the source of light. In addition to being enclosed from flammable or explosive vapors, such a lamp should be easily adjustable to different heights above the floor and to different positions relative to the field to be illuminated by reflection. The electrical circuit should not be established or broken except within an explosion-proof receptacle at the wall, unless an approved switch of the explosion-proof type is provided.

An enclosed lamp (illustration) which conforms to the criteria that have been re-

viewed above has been constructed from readily obtainable materials:

1. Floor standard and goose-neck, from obsolete infra-red therapy lamp.
2. U. S. Navy surplus vapor-proof lamp, of the pendant type. The globe enclosing this lamp is composed of heavy glass, capable of withstanding hard usage without breaking. When the globe has been heated by prolonged use it withstands brief contact with cold liquids, but not immersion.
3. Heavy-duty, insulated, three-wire electrical cord to explosion-proof plug.
4. 250 Watt lamp bulb.

JOHN R. LINCOLN, M.D.,  
*Director of Anesthesia,  
 Maine General Hospital,  
 Portland, Maine.*

### CORRESPONDENCE

#### *To the Editor:*

Two years ago I described a "reverse action forceps" for easy insertion of endotracheal tubes in cuffs (1), but the device was found to be too difficult to manufacture at a moderate price, so the idea of their manufacture was dropped. Later it was discovered that the Killian Nasal Speculum with 3-inch or 3½-inch blades, is even better for the application of cuffs (fig. 1). The speculum can usually be found in any well-equipped operating room. The

blades are tapered to permit a cuff of any size to slip over them. It is important that the speculum be made of steel, to be strong enough for this purpose.

#### REFERENCE

1. Lipson, Henry I.: Reverse Action Forceps for Easy Insertion of Endotracheal Tubes into Cuffs, *Anesthesiology* 8: 89 (Jan.) 1947.

HENRY I. LIPSON, M.D.,  
*Fort Howard, Maryland*

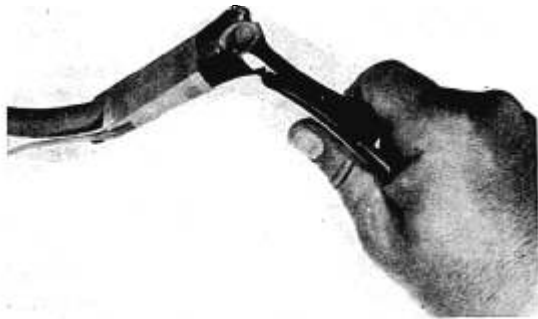

FIG. 1.
